# Supplementary material for: Subclinical Atrial Fibrillation on Prolonged ECG Holter Monitoring: Results from the Multicenter Real-World SAFARI (Silent Atrial Fibrillation ANCE-Sicily Research Initiative) Study
Source: MDPI journal article supplement (doi:10.3390/jcdd10080336), 2023-08-04
Supplement: s1 [file s1]

## SAFARI STUDY DESIGN

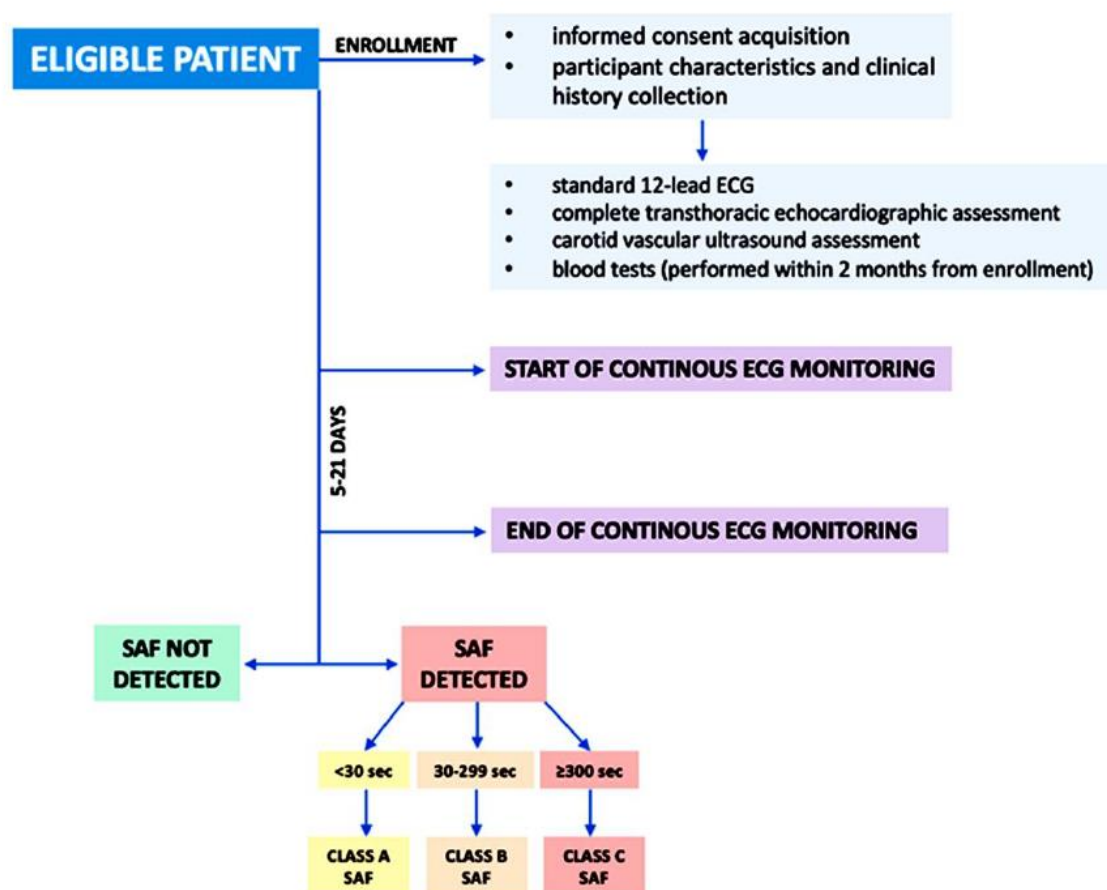

Figure S1. SAFARI study design.

**Table S1.** Inclusion and exclusion criteria for patient enrolment.

| <b>INCLUSION CRITERIA</b>                                                     |                                                                                           |
|-------------------------------------------------------------------------------|-------------------------------------------------------------------------------------------|
| <i>Patients ≥55 years old, with at least one of the following conditions:</i> |                                                                                           |
| •                                                                             | Arterial hypertension                                                                     |
| •                                                                             | Carotid and/or peripheral vascular disease (not critical)                                 |
| •                                                                             | Chronic obstructive pulmonary disease (not on β2-agonists)                                |
| •                                                                             | Diabetes                                                                                  |
| •                                                                             | Dyslipidaemia                                                                             |
| •                                                                             | Heart failure with preserved or mildly reduced ejection fraction (HFpEF or HFmrEF)        |
| •                                                                             | Heart valve disease (no severe forms)                                                     |
| •                                                                             | Hypertrophic cardiomyopathy (no obstructive forms)                                        |
| •                                                                             | Ischemic heart disease (stable)                                                           |
| •                                                                             | Obstructive sleep apnoea                                                                  |
| •                                                                             | Overweight/obesity                                                                        |
| •                                                                             | Pulmonary hypertension (pre-capillary)                                                    |
| •                                                                             | Renal disease (stages I-III)                                                              |
| •                                                                             | Smoking habit                                                                             |
| •                                                                             | Thyroid disease (chronic)                                                                 |
| <i>and at least one of the following:</i>                                     |                                                                                           |
| •                                                                             | History of palpitation                                                                    |
| •                                                                             | Left atrial dilatation (>34 ml/m <sup>2</sup> or >22 cm <sup>2</sup> )                    |
| •                                                                             | Right atrial dilatation (>30 ml/m <sup>2</sup> or >20 cm <sup>2</sup> )                   |
| •                                                                             | Frequent premature atrial beats                                                           |
| •                                                                             | Previous transient ischemic attack (TIA)/minor stroke/gliosis                             |
| <b>EXCLUSION CRITERIA</b>                                                     |                                                                                           |
| <i>Any of the following:</i>                                                  |                                                                                           |
| •                                                                             | Age <55 years                                                                             |
| •                                                                             | Cardiac amyloidosis or storage diseases                                                   |
| •                                                                             | Cardiac valve prosthesis                                                                  |
| •                                                                             | Chronic hepatopathy or cirrhosis                                                          |
| •                                                                             | Chronic kidney disease (>III stage)                                                       |
| •                                                                             | First or second-degree atrioventricular block or sick sinus syndrome                      |
| •                                                                             | Heart failure with reduced ejection fraction (HFrEF)                                      |
| •                                                                             | Malignancy                                                                                |
| •                                                                             | Mitral valve prolapse with regurgitation grad 2-3 and/or mitral annular disjunction (MAD) |
| •                                                                             | History of atrial fibrillation                                                            |
| •                                                                             | Recent acute coronary syndrome                                                            |
| •                                                                             | Recent pulmonary edema (6 months)                                                         |
| •                                                                             | Severe aortic or mitral valve disease (stenosis/ regurgitation)                           |
